# Supplementary material for: Potential of Natural Phenolic Compounds as Antimicrobial Agents against Multidrug-Resistant Staphylococcus aureus in Chicken Meat
Source: MDPI journal article supplement (doi:10.3390/molecules28186742), 2023-09-21
Supplement: s1 [file s1]

## **Supplementary data**

### **Potential of Natural Phenolic Compounds as Antimicrobial Agents against Multidrug-Resistant *Staphylococcus aureus* in Chicken Meat**

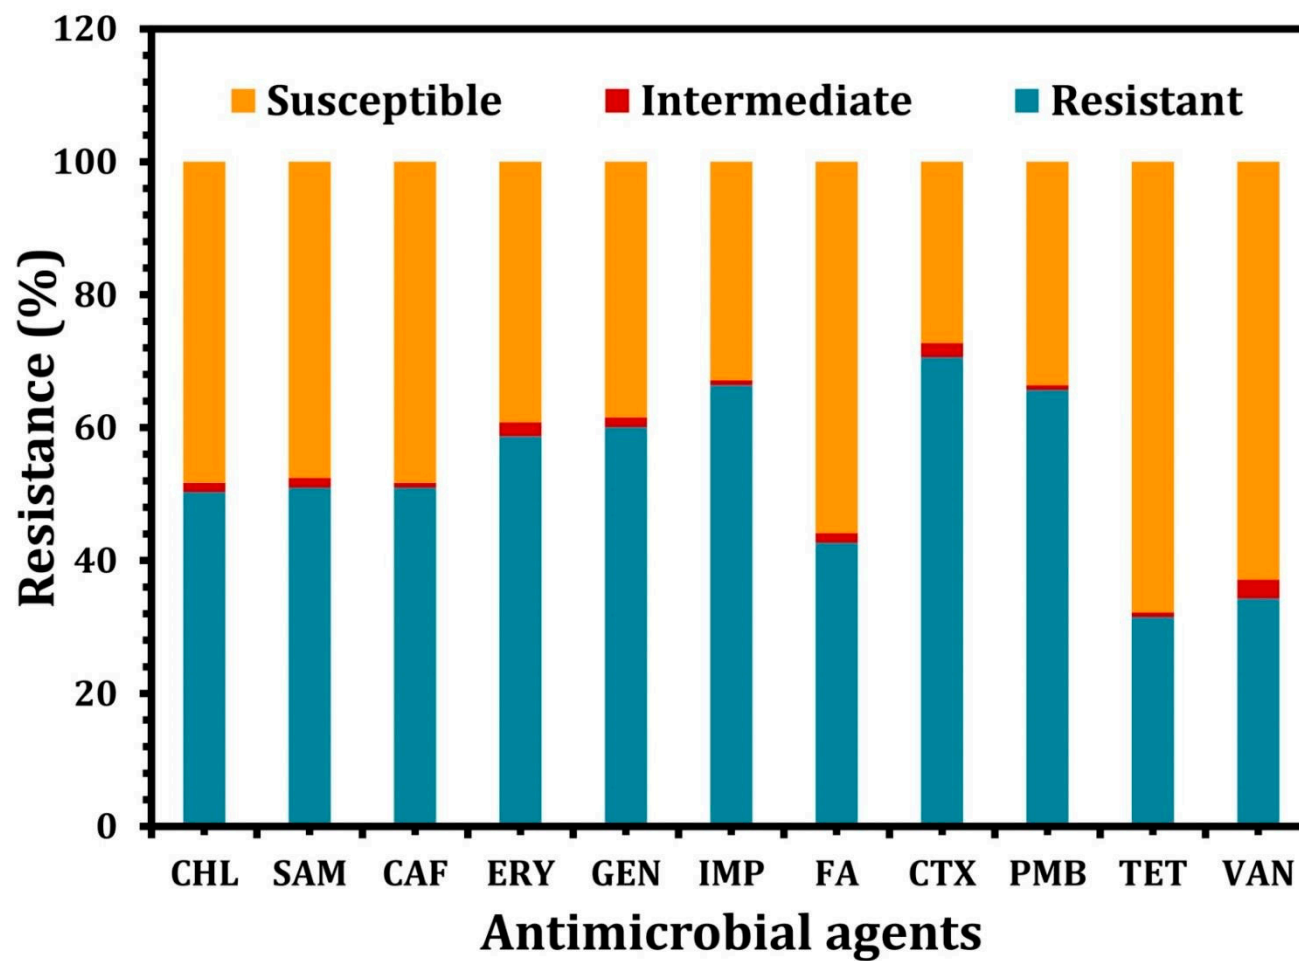

**Figure S1.** The susceptibility patterns (in percentages) against the tested antibiotics against *S. aureus* strains isolated from raw chicken meat samples.
